# Supplementary material
Source: PubMed Central journal article supplement (PMC419686)
Supplement: pnas_101_20_7799__1.pdf [file pnas_101_20_7799__1.pdf]

**Table 1. Control single-channel properties of Kir6.2/SUR2B prior to drug treatment (in absolute values).**

| Group | Coexpression | Treatment     | $NP_o$<br>(%)     | Opening frequency<br>( $s^{-1}$ ) | Open time<br>(ms) | Closed time<br>(ms) | N   |
|-------|--------------|---------------|-------------------|-----------------------------------|-------------------|---------------------|-----|
| 1.    | ----         | Noc-18        | $0.47 \pm 0.23$   | $2.98 \pm 1.21$                   | $1.24 \pm 0.11$   | $574.0 \pm 190.5$   | 5   |
| 2.    | ----         | PTIO + Noc-18 | $0.81 \pm 0.46$   | $4.68 \pm 2.42$                   | $1.17 \pm 0.32$   | $843.7 \pm 359.9$   | 5   |
| 3.    | ----         | 8-Br-cGMP     | $0.24 \pm 0.11$   | $1.87 \pm 0.73$                   | $1.06 \pm 0.18$   | $2097.0 \pm 1381.0$ | 6   |
| 4.    | ----         | ODQ + Noc-18  | $1.12 \pm 0.58$   | $6.55 \pm 3.30$                   | $1.40 \pm 0.21$   | $978.3 \pm 455.4$   | 6   |
| 5.    | ----         | L-Arg         | $0.17 \pm 0.14$   | $1.36 \pm 1.00$                   | $0.75 \pm 0.30$   | $5361.0 \pm 3529.0$ | 4-6 |
| 6.    | Ras          | L-Arg         | $0.07 \pm 0.06$   | $0.49 \pm 0.34$                   | $1.33 \pm 0.40$   | $6425.0 \pm 3047.0$ | 3-4 |
| 7.    | RasN17       | L-Arg         | $0.12 \pm 0.04$   | $0.90 \pm 0.33$                   | $1.39 \pm 0.11$   | $1363.0 \pm 424.6$  | 3   |
| 8.    | Ras          | Noc-18        | $0.10 \pm 0.05$   | $0.53 \pm 0.23$                   | $1.80 \pm 0.24$   | $3748.0 \pm 2465.0$ | 3   |
| 9.    | RasV12       | Noc-18        | $15.74 \pm 11.15$ | $75.67 \pm 54.20$                 | $2.09 \pm 0.12$   | $39.7 \pm 13.3$     | 5   |
| 10.   | RasN17       | Noc-18        | $0.15 \pm 0.07$   | $0.99 \pm 0.47$                   | $1.41 \pm 0.25$   | $2679.0 \pm 2102.0$ | 3   |
| 11.   | RasC118S     | Noc-18        | $7.09 \pm 6.40$   | $20.78 \pm 18.05$                 | $2.42 \pm 0.52$   | $421.2 \pm 215.6$   | 4   |

Single-channel recordings of Kir6.2/SUR2B channels in cell-attached patches were obtained as described in *Materials and Methods*. Cells in groups 1-5 were transfected with channel cDNAs alone, whereas cells in groups 6-11 were transfected with channel cDNAs together with either wildtype or mutated Ras cDNA. Control single-channel currents recorded immediately prior to “Treatment” of Noc-18 or other drugs were analyzed. Values under N indicate number of patches. Data were averaged in each group and are presented as mean  $\pm$  S.E.M. Whereas the open time is comparable in all experiments, other parameters vary with the number of active channels in the patch.
